# Supplementary material for: Analysis of ship emission effects on clouds over the southeastern Atlantic using geostationary satellite observations
Source: Copernicus journal article supplement (doi:10.5194/egusphere-2024-3135), 2024-10-11
Supplement: Supplementary file 1 [file egusphere-2024-3135-supplement.pdf]

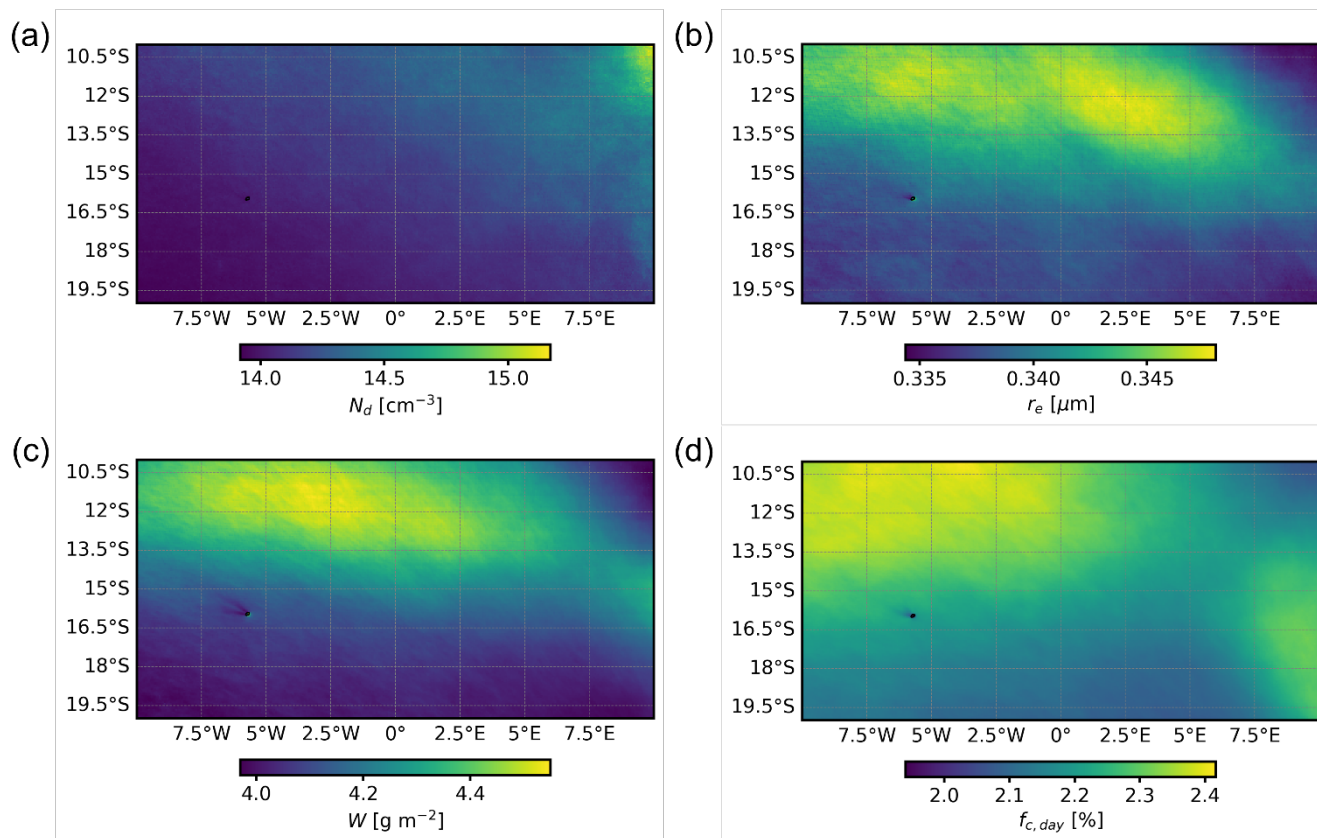

**Figure S1: Propagated uncertainties of monthly time series average  $N_d$  (a),  $r_e$  (b),  $W$  (c) and  $f_{c, \text{day}}$  (d) over the study region.**

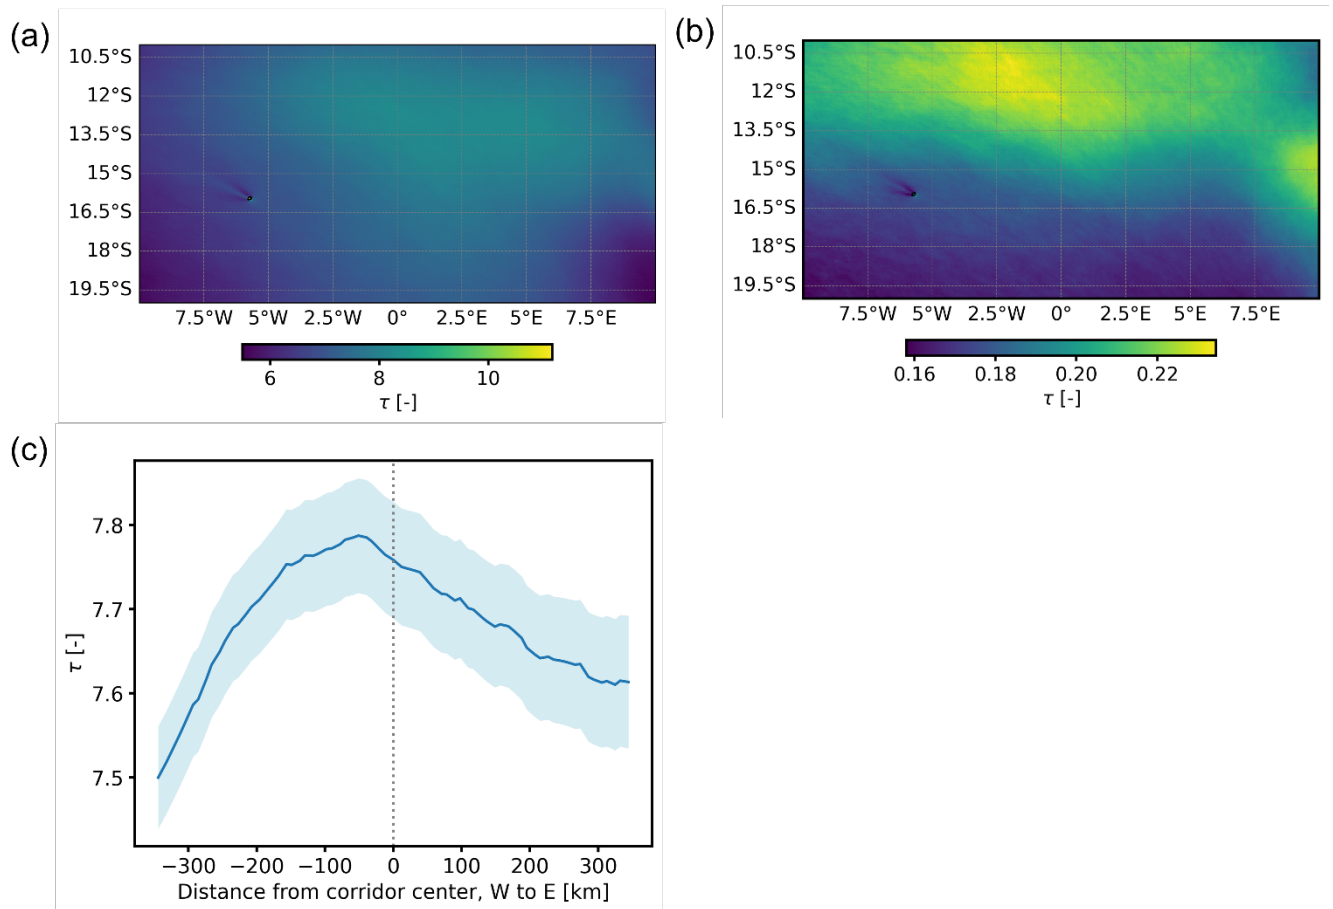

5 **Figure S2: (a), (b) Maps of monthly time series averages of liquid cloud optical thickness  $\tau$  and corresponding propagated uncertainties over the study region. (c) Across-corridor average distribution of  $\tau$ , with the propagated uncertainties in light blue shade.**

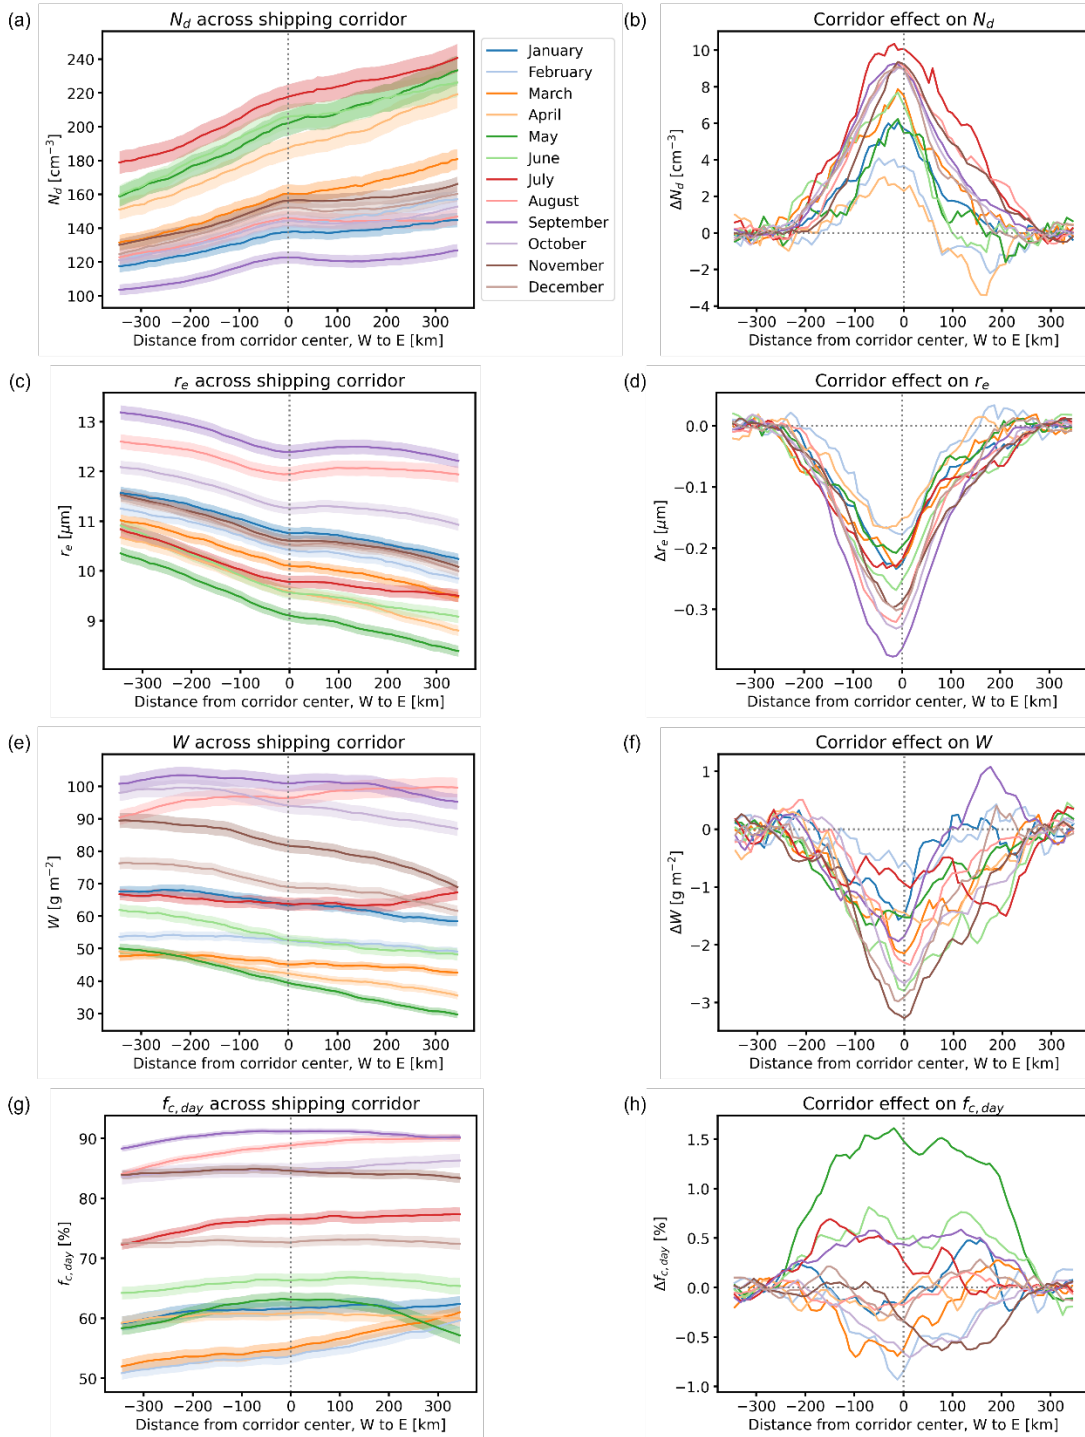

10 **Figure S3: Monthly cross-corridor average distributions of  $N_d$  (a), liquid  $r_e$  (c),  $W$  (e) and  $f_{c, \text{day}}$  (g), with the uncertainties shown in shades. Plots (b), (d), (f) and (h) show the corresponding monthly profiles of corridor effects, with uncertainties omitted for clarity.**

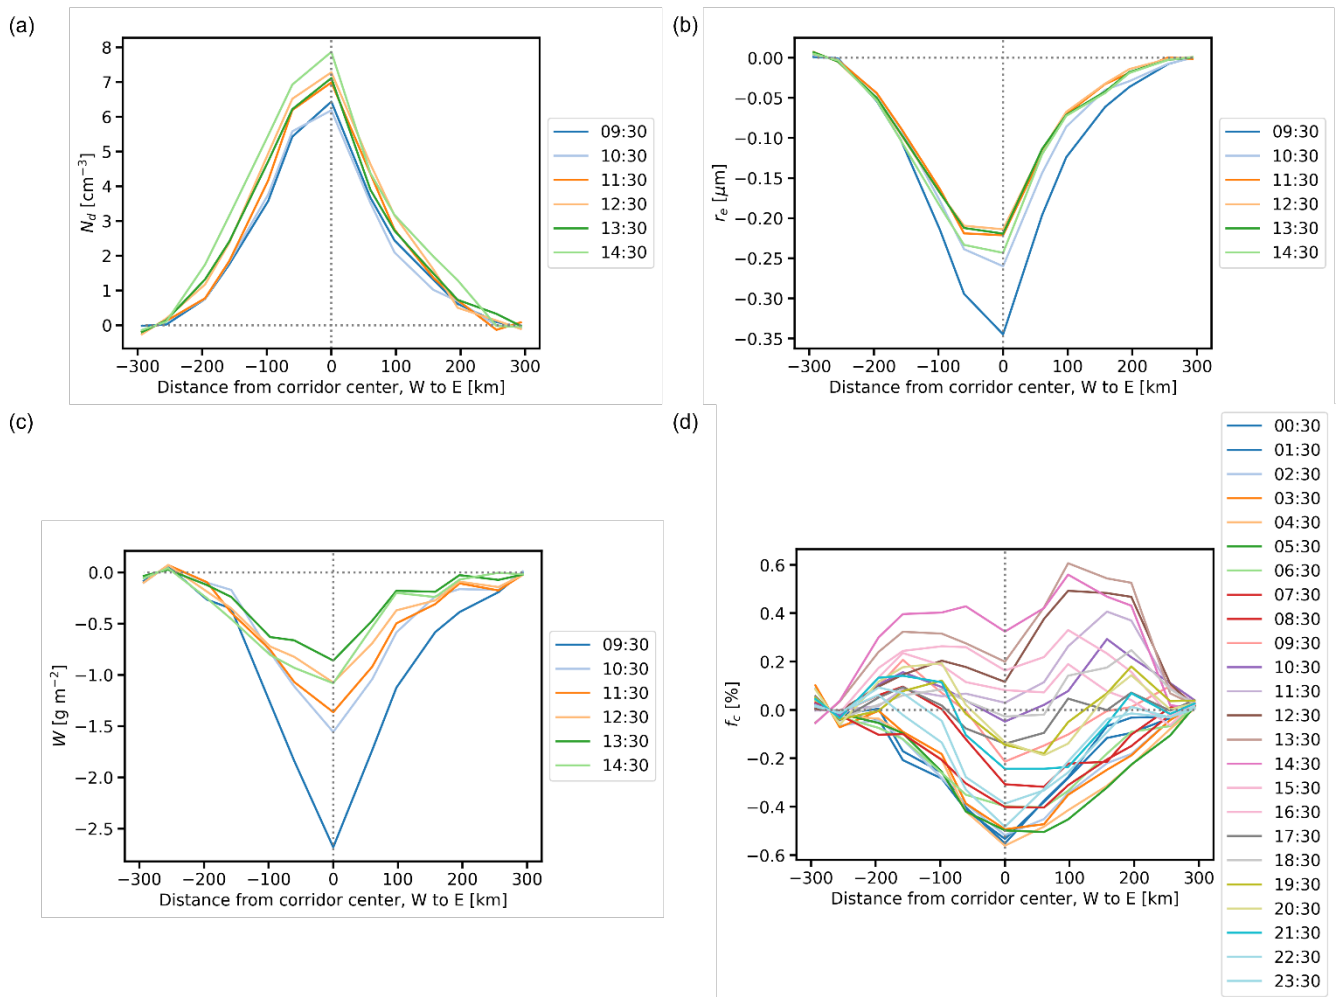

15 **Figure S4: Hourly cross-corridor average distributions of corridor effects on  $N_d$  (a), liquid  $r_e$  (b),  $W$  (c) and  $f_c$  (d). Vertical dotted lines denote the corridor center.**

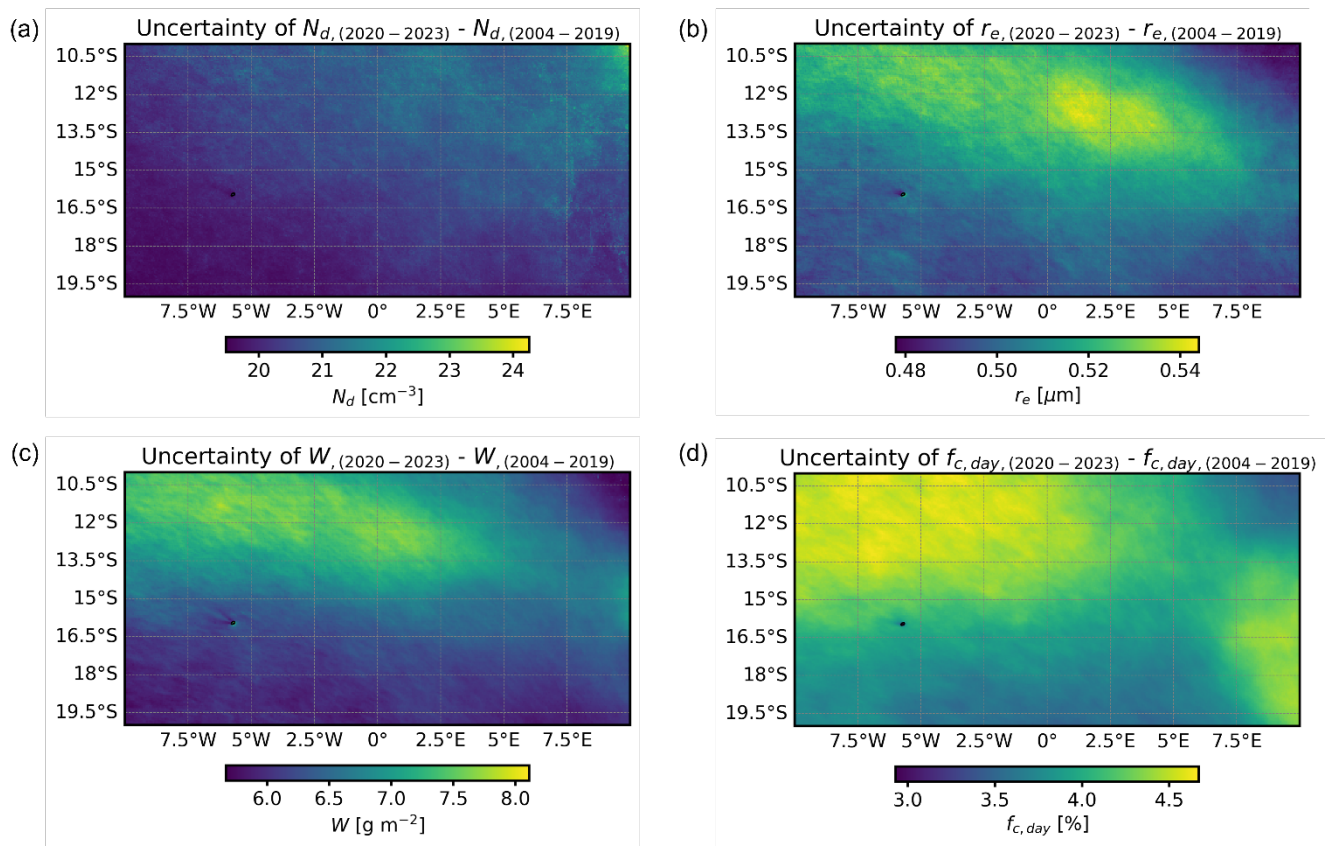

**Figure S5: Maps of uncertainties of the differences between the after and before 2020 averages for  $N_d$  (a), liquid  $r_e$  (b),  $W$  (c) and  $f_{c,day}$  (d).**

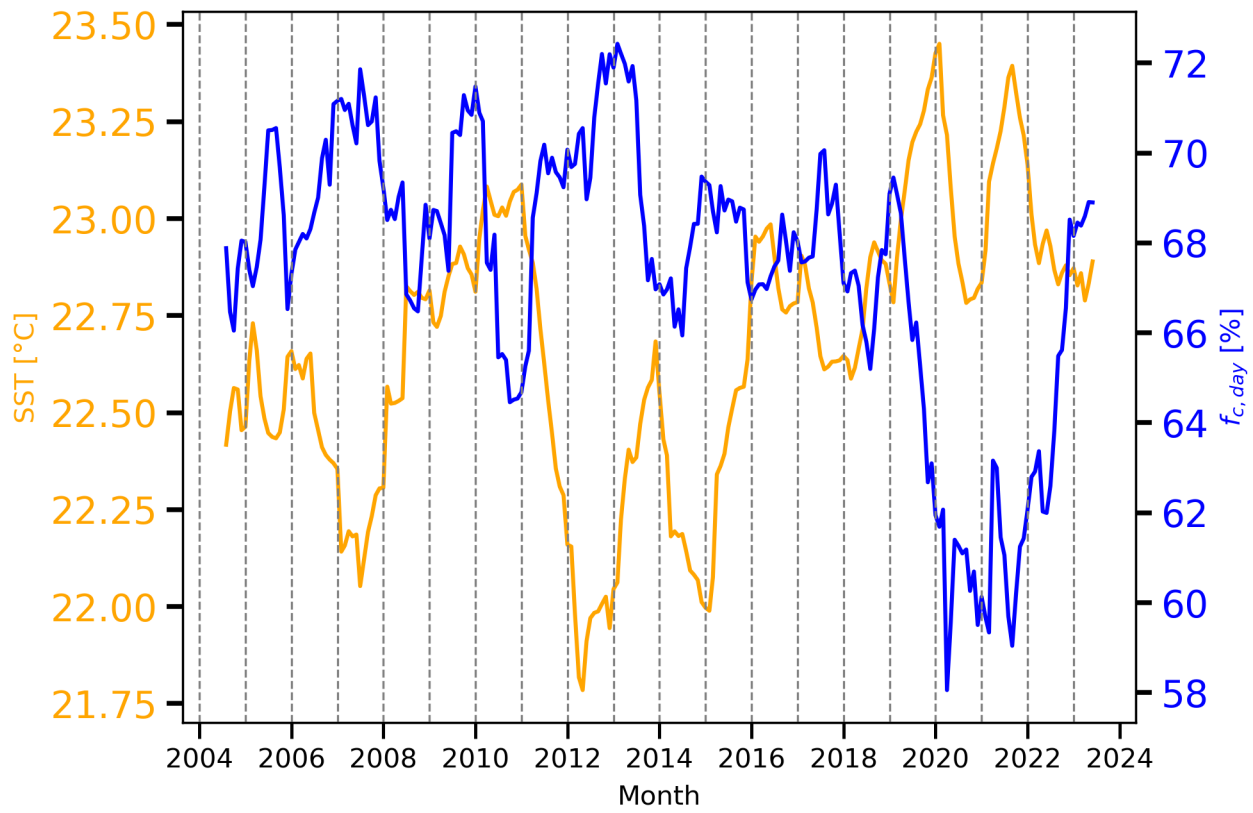

**Figure S6:** Time series of monthly averaged  $f_{c, day}$  and SST during 2003-2024 over the study region, deseasonalized using a 12-month running average. The bands of propagated uncertainties are omitted for clarity.
